# Supplementary material
Source: publisher site journal article supplement (https://spandidos-publications.com/6193/downloadSupplementary)

Figure S1. Relative PEDF mRNA expression levels in placenta samples collected from healthy individuals and individuals with PAS. n=20 in each group. \*P<0.05 vs. normal. PAS, placenta accreta spectrum; PEDF, pigment epithelium-derived factor.

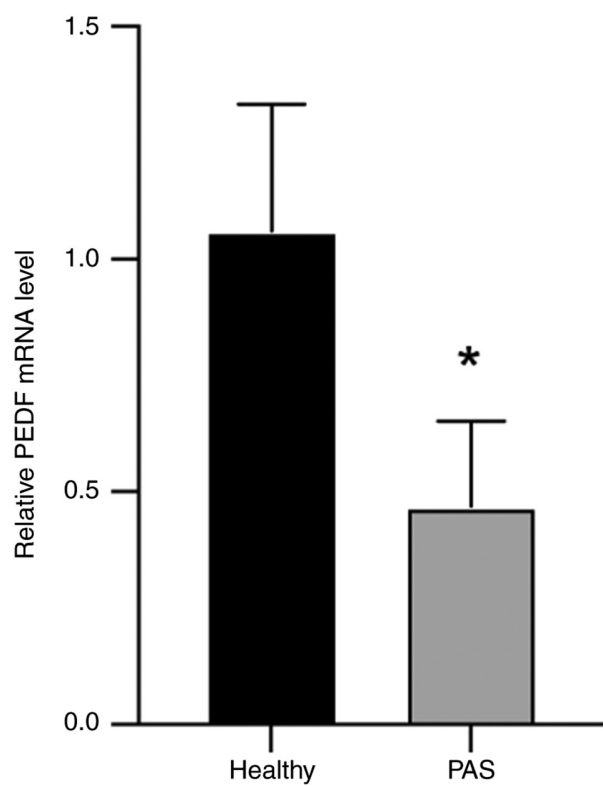

Figure S2. Protein expression levels of (A) PEDF and (B) VEGF in extravillous trophoblast cells.  $^{***}P < 0.01$  vs. OE-NC or siNC. OE-NC, control empty vector for overexpression; OE-PEDF, PEDF overexpression vector; OE-VEGF, VEGF overexpression vector; PEDF, pigment epithelium-derived factor; siNC, small interfering RNA negative control; siPEDF, small interfering RNA targeting PEDF; VEGF, vascular endothelial growth factor.

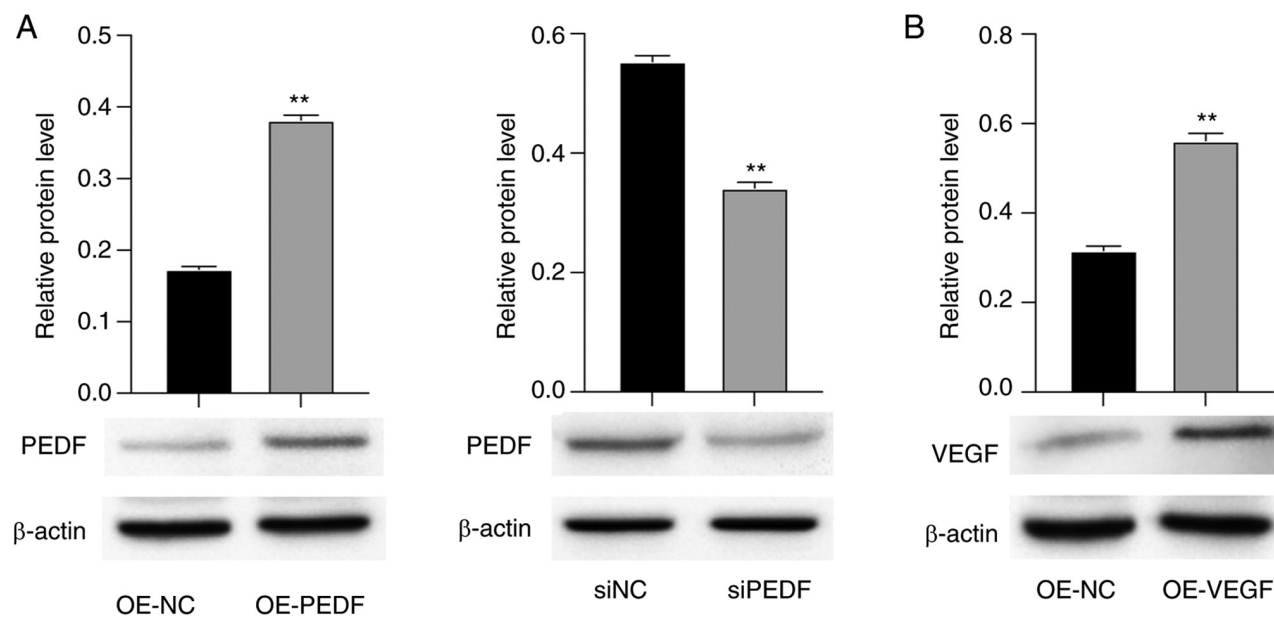

Figure S3. Quantification of wound healing experiment using extravillous trophoblast cells transfected with OE-PEDF or siPEDF. NC, negative control; OE-NC, control empty vector for overexpression; OE-PEDF, PEDF overexpression vector; PEDF, pigment epithelium-derived factor; siNC, small interfering RNA negative control; siPEDF, small interfering RNA targeting PEDF.

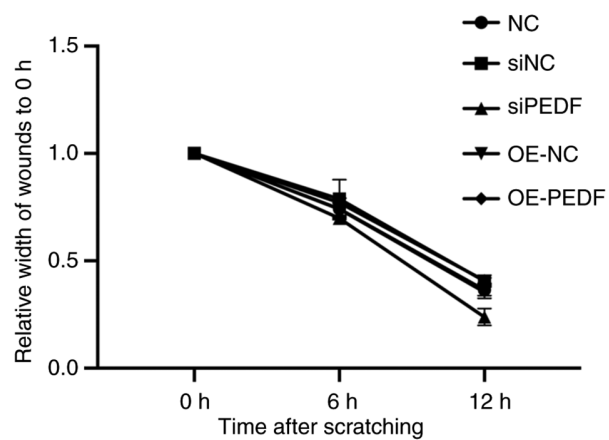

Figure S4. Quantification of wound healing experiment using extravillous trophoblast cells transfected with OE-PEDF and treated with Fer-1 or BML-284 or transfected with OE-VEGF. Fer-1, ferrostatin-1; OE-NC, control empty vector for overexpression; OE-PEDF, PEDF overexpression vector; PEDF, pigment epithelium-derived factor; OE-VEGF, VEGF overexpression vector; VEGF, vascular endothelial growth factor.

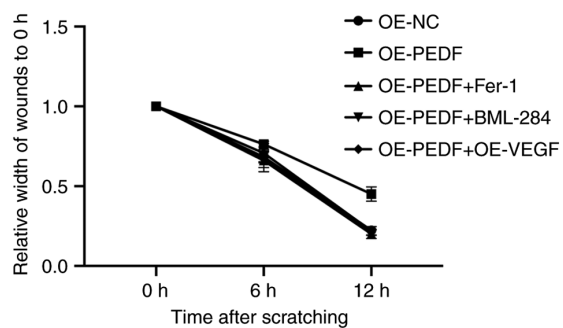

Supplement: Supplementary file 1 [file downloadSupplementary]
